# Supplementary material for: Sensitive pH Monitoring Using a Polyaniline-Functionalized Fiber Optic—Surface Plasmon Resonance Detector
Source: MDPI journal article supplement (doi:10.3390/s21124218), 2021-06-19
Supplement: s1 [file s1]

Supplementary Information

# Sensitive pH monitoring using a polyaniline-functionalized fiber optic–surface plasmon resonance detector

Iulia Antohe <sup>1</sup>, Luiza-Izabela Jinga <sup>1</sup>, Vlad-Andrei Antohe <sup>2,3</sup> and Gabriel Socol <sup>1,\*</sup>

<sup>1</sup> National Institute for Laser, Plasma and Radiation Physics (INFLPR), Atomistilor Street 409, 077125 Măgurele, Ilfov, Romania; iulia.antophe@inflpr.ro (I.A.); izabela.jinga@inflpr.ro (L.-I.J.)

<sup>2</sup> Faculty of Physics, R&D Center for Materials and Electronic & Optoelectronic Devices (MDEO), University of Bucharest, Atomistilor Street 405, 077125 Măgurele, Ilfov, Romania; vlad.antophe@fizica.unibuc.ro

<sup>3</sup> Institute of Condensed Matter and Nanosciences (IMCN), Université Catholique de Louvain (UCLouvain), Place Croix du Sud 1, B-1348 Louvain-la-Neuve, Belgium

\* Correspondence: gabriel.socol@inflpr.ro; Tel.: +40-(0)-21-457-4450 (ext. 2045)

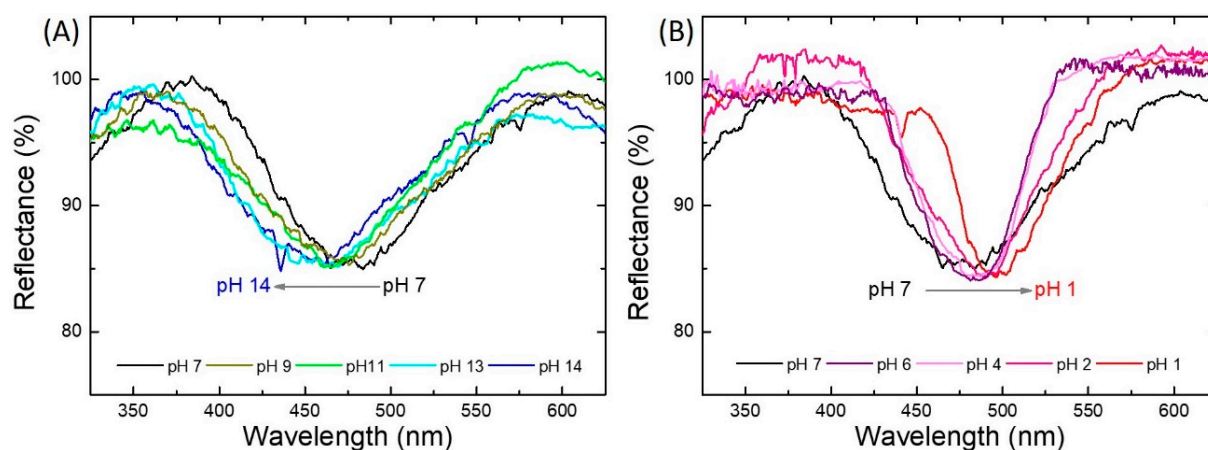

**Figure S1.** Typical spectral dips obtained in (A) alkaline and (B) acidic pH solutions (ranging from pH 1 to pH 14), acquired with a reflection-type polyaniline/platinum (PANI/Pt) bilayer-coated Fiber Optic – Surface Plasmon Resonance (FO-SPR) sensor. The FO-SPR spectral dip corresponding to the neutral pH (7) is depicted in black.
